# Supplementary material
Source: publisher figshare collection journal article supplement (https://tandf.figshare.com/ndownloader/files/22247565)
Supplement: Supplementary file 1 [file 22247565]

## Sheet: Database-StatAnaly-PE,FO,HM,Sup
	Fixed factors			variable responses (%)			Rank transformed raw data					Statistical Analysis									Statistical Analysis											Statistical Analysis
Replicate	Cc strain	HET	HD	PE	FO	Sup	RankTranf-PE	RankTransf-FO	RankTransfLsup																																			Correlation
1	Cc-TSL	30'	30L	34.375	0	65	187.5	8.5	199			%PE									%FO											%Sup												Pearson Product Moment Correlation
2	Cc-TSL	30'	30L	35.2941	16.6667	77	194	30.5	207
3	Cc-TSL	30'	30L	14.7059	60	70	58	303.5	231.5																																			Cell Contents:		Sup	FO
4	Cc-TSL	30'	30L	12.5	0	71	52	8.5	251.5																																			Correlation Coefficient			5.28E-001	0.5278
5	Cc-TSL	30'	30L	5.71429	50	75	22.5	201.5	199																																			P Value			3.28E-027	p=0,00
6	Cc-TSL	30'	30L	44.4444	41.6667	69	264	111.5	254																																			Number of Samples			360	360
7	Cc-TSL	30'	30L	15.625	20	60	67	40	231.5
8	Cc-TSL	30'	30L	5.71429	50	68	22.5	201.5	302
9	Cc-TSL	30'	30L	8.82353	0	70	37	8.5	231.5
10	Cc-TSL	30'	30L	6.06061	50	70	27.5	201.5	186
1	Cc-TSL	30'	60L	3.07692	50	70	5.5	201.5	156.5
2	Cc-TSL	30'	60L	3.22581	50	65	9.5	201.5	108.5																																				Mean	Std.Dv.	r(X,Y)	r²	t
3	Cc-TSL	30'	60L	3.27869	50	60	11.5	201.5	58.5																																			%Lsup_Bis	79.2472	13.1233
4	Cc-TSL	30'	60L	7.8125	60	65	34	303.5	108.5																																			TSex	51.1003	16.5702	0.527793	0.278566	11.7573
5	Cc-TSL	30'	60L	25.4237	46.6667	74	122	151	93.5
6	Cc-TSL	30'	60L	19.0476	25	68	81	51	58.5
7	Cc-TSL	30'	60L	3.63636	50	67	14	201.5	25
8	Cc-TSL	30'	60L	13.6364	11.1111	69	54	21	34
9	Cc-TSL	30'	60L	3.27869	50	69	11.5	201.5	34
10	Cc-TSL	30'	60L	10.5263	16.6667	68	43	30.5	28
1	Cc-TSL	30'	90L	2.24719	50	70	3	201.5	58.5
2	Cc-TSL	30'	90L	16.6667	13.3333	71	73	25	82.5
3	Cc-TSL	30'	90L	15.3846	7.14286	70	64	17	58.5
4	Cc-TSL	30'	90L	14.8936	21.4286	70	61	44	58.5
5	Cc-TSL	30'	90L	10.4651	22.2222	70	42	45	58.5
6	Cc-TSL	30'	90L	2.29885	50	60	4	201.5	9.5
7	Cc-TSL	30'	90L	2.17391	100	64	2	360	18
8	Cc-TSL	30'	90L	22.619	15.7895	56	101	28	3
9	Cc-TSL	30'	90L	14.2857	23.0769	65	56	47	21.5
10	Cc-TSL	30'	90L	8.04598	14.2857	62	35	27	17
1	Cc-TSL	60'	30L	58.6207	35.2941	60	343	76	276.5
2	Cc-TSL	60'	30L	5.88235	50	61	25.5	201.5	276.5
3	Cc-TSL	60'	30L	44.1176	33.3333	69	261	68.5	276.5
4	Cc-TSL	60'	30L	5.88235	50	65	25.5	201.5	276.5
5	Cc-TSL	60'	30L	25	50	66	120.5	201.5	211
6	Cc-TSL	60'	30L	14.7059	20	61	58	40	276.5
7	Cc-TSL	60'	30L	6.06061	0	64	27.5	8.5	276.5
8	Cc-TSL	60'	30L	3.125	0	60	7.5	8.5	276.5
9	Cc-TSL	60'	30L	38.7097	0	60	218.5	8.5	302
10	Cc-TSL	60'	30L	6.25	50	70	29	201.5	276.5
1	Cc-TSL	60'	60L	40	50	86	231.5	201.5	205.5
2	Cc-TSL	60'	60L	28.9157	50	80	148	201.5	156.5
3	Cc-TSL	60'	60L	39.2157	50	70	222	201.5	58.5
4	Cc-TSL	60'	60L	23.8095	50	80	107.5	201.5	156.5
5	Cc-TSL	60'	60L	26.9231	95.2381	74	137	359	93.5
6	Cc-TSL	60'	60L	38.4615	40	85	214.5	99	199
7	Cc-TSL	60'	60L	40	50	83	231.5	201.5	191
8	Cc-TSL	60'	60L	25	50	80	120.5	201.5	156.5
9	Cc-TSL	60'	60L	24.3902	50	75	116	201.5	108.5
10	Cc-TSL	60'	60L	40.3226	36	76	234	80	123
1	Cc-TSL	60'	90L	19.7917	52.6316	70	87	243.5	58.5
2	Cc-TSL	60'	90L	8.88889	62.5	75	38	317	108.5
3	Cc-TSL	60'	90L	43.75	20	70	257	40	58.5
4	Cc-TSL	60'	90L	41.25	27.2727	72	241	56	87
5	Cc-TSL	60'	90L	23.5294	60	70	104	303.5	58.5
6	Cc-TSL	60'	90L	37.5	27.2727	75	206.5	56	108.5
7	Cc-TSL	60'	90L	19.2308	13.3333	80	83.5	25	156.5
8	Cc-TSL	60'	90L	42.5532	22.5	79	250	46	129
9	Cc-TSL	60'	90L	16.4706	57.1429	68	70	282.5	28
10	Cc-TSL	60'	90L	13.7255	57.1429	72	55	282.5	87
1	Cc-TSL	90'	30L	20	50	95	89	201.5	276.5
2	Cc-TSL	90'	30L	53.125	11.7647	95	315.5	22	276.5
3	Cc-TSL	90'	30L	34.375	63.6364	95	187.5	327	276.5
4	Cc-TSL	90'	30L	26.087	50	95	130.5	201.5	276.5
5	Cc-TSL	90'	30L	46.875	53.3333	100	287	251	334.5
6	Cc-TSL	90'	30L	37.5	58.3333	95	206.5	289.5	276.5
7	Cc-TSL	90'	30L	38.7097	75	100	218.5	347	334.5
8	Cc-TSL	90'	30L	46.6667	57.1429	100	282.5	282.5	334.5
9	Cc-TSL	90'	30L	16.6667	20	100	73	40	334.5
10	Cc-TSL	90'	30L	54.5455	38.8889	95	322	92	276.5
1	Cc-TSL	90'	60L	60.4938	42.8571	90	349	119	231.5
2	Cc-TSL	90'	60L	67.0588	54.386	80	360	261	156.5
3	Cc-TSL	90'	60L	62.7907	66.6667	70	354	333	58.5
4	Cc-TSL	90'	60L	45	48.1481	80	271	163	156.5
5	Cc-TSL	90'	60L	56.1644	68.2927	70	332	337	58.5
6	Cc-TSL	90'	60L	49.5935	62.2951	85	302	316	199
7	Cc-TSL	90'	60L	61.8421	61.7021	90	352	315	231.5
8	Cc-TSL	90'	60L	59.0361	61.2245	80	344	311	156.5
9	Cc-TSL	90'	60L	61.4583	55.9322	75	351	274	108.5
10	Cc-TSL	90'	60L	58.0247	72.3404	90	338	343	231.5
1	Cc-TSL	90'	90L	62.963	52.9412	80	355	250	156.5
2	Cc-TSL	90'	90L	63.7255	49.2308	75	358	179	108.5
3	Cc-TSL	90'	90L	57.3034	47.0588	70	335	158	58.5
4	Cc-TSL	90'	90L	51.1628	38.6364	80	305	91	156.5
5	Cc-TSL	90'	90L	56.044	43.1373	70	331	123	58.5
6	Cc-TSL	90'	90L	62.6984	46.8354	75	353	156	108.5
7	Cc-TSL	90'	90L	42.7586	56.4516	80	253	278	156.5
8	Cc-TSL	90'	90L	53.0864	62.7907	80	314	319	156.5
9	Cc-TSL	90'	90L	63.0435	37.931	80	356	86	156.5
10	Cc-TSL	90'	90L	57.5	56.5217	75	336	279	108.5
1	Cc-TSL	120'	30L	32.2581	50	100	169	201.5	334.5
2	Cc-TSL	120'	30L	51.7241	40	100	311	99	276.5
3	Cc-TSL	120'	30L	40	75	100	231.5	347	334.5
4	Cc-TSL	120'	30L	19.2308	40	100	83.5	99	334.5
5	Cc-TSL	120'	30L	44.8276	76.9231	100	269.5	349	334.5
6	Cc-TSL	120'	30L	42.3077	63.6364	95	248	327	276.5
7	Cc-TSL	120'	30L	51.6129	56.25	100	308	276	334.5
8	Cc-TSL	120'	30L	55.5556	40	100	326.5	99	334.5
9	Cc-TSL	120'	30L	44	63.6364	100	260	327	334.5
10	Cc-TSL	120'	30L	46.6667	28.5714	100	282.5	59	334.5
1	Cc-TSL	120'	60L	51.6667	77.4194	90	310	350.5	231.5
2	Cc-TSL	120'	60L	33.6957	77.4194	87	181	350.5	156.5
3	Cc-TSL	120'	60L	3.38983	0	90	13	8.5	156.5
4	Cc-TSL	120'	60L	33.3333	57.8947	80	180	287	156.5
5	Cc-TSL	120'	60L	64.4068	52.6316	90	359	243.5	156.5
6	Cc-TSL	120'	60L	28.3333	17.6471	85	143	33	199
7	Cc-TSL	120'	60L	50	13.3333	90	303	25	231.5
8	Cc-TSL	120'	60L	53.2258	39.3939	90	318	94	156.5
9	Cc-TSL	120'	60L	41.6667	68	90	245	336	156.5
10	Cc-TSL	120'	60L	32.3077	71.4286	95	170	339.5	156.5
1	Cc-TSL	120'	90L	41.3043	50	80	243	201.5	156.5
2	Cc-TSL	120'	90L	31.5789	20	80	163	40	156.5
3	Cc-TSL	120'	90L	43.2099	51.4286	75	255	232	58.5
4	Cc-TSL	120'	90L	45.0549	34.1463	80	272	71.5	156.5
5	Cc-TSL	120'	90L	44.8276	28.2051	90	269.5	58	58.5
6	Cc-TSL	120'	90L	40	30.5556	85	231.5	61	199
7	Cc-TSL	120'	90L	39.4737	63.3333	90	227	323	231.5
8	Cc-TSL	120'	90L	40.4255	50	85	235	201.5	156.5
9	Cc-TSL	120'	90L	36.9565	20.5882	85	203	43	156.5
10	Cc-TSL	120'	90L	38.0952	9.375	85	209	19	156.5
1	Cc-BIS-SJ	30'	30L	8.57143	66.6667	63	36	333	191
2	Cc-BIS-SJ	30'	30L	6.77966	0	70	30	8.5	231.5
3	Cc-BIS-SJ	30'	30L	3.125	50	70	7.5	201.5	231.5
4	Cc-BIS-SJ	30'	30L	5.08475	0	75	19	8.5	276.5
5	Cc-BIS-SJ	30'	30L	3.22581	50	70	9.5	201.5	231.5
6	Cc-BIS-SJ	30'	30L	11.2676	0	62	45	8.5	186
7	Cc-BIS-SJ	30'	30L	4.22535	33.3333	60	17	68.5	231.5
8	Cc-BIS-SJ	30'	30L	5.45455	0	67	20	8.5	231.5
9	Cc-BIS-SJ	30'	30L	3.07692	0	69	5.5	8.5	211
10	Cc-BIS-SJ	30'	30L	7.01754	0	68	31	8.5	208.5
1	Cc-BIS-SJ	30'	60L	26.087	33.3333	65	130.5	68.5	108.5
2	Cc-BIS-SJ	30'	60L	7.74194	50	67	33	201.5	108.5
3	Cc-BIS-SJ	30'	60L	15.0794	36.8421	70	62	83	123
4	Cc-BIS-SJ	30'	60L	17.9688	60.8696	71	78	309	108.5
5	Cc-BIS-SJ	30'	60L	3.7037	40	64	15.5	99	93.5
6	Cc-BIS-SJ	30'	60L	1.65289	50	70	1	201.5	58.5
7	Cc-BIS-SJ	30'	60L	14.8148	35	72	60	74	126
8	Cc-BIS-SJ	30'	60L	22.5564	23.3333	71	100	48	82.5
9	Cc-BIS-SJ	30'	60L	40.9449	28.8462	67	238	60	128
10	Cc-BIS-SJ	30'	60L	10.3704	50	60	41	201.5	156.5
1	Cc-BIS-SJ	30'	90L	9.52381	50	60	39.5	201.5	9.5
2	Cc-BIS-SJ	30'	90L	15.5556	42.8571	61	65.5	119	15.5
3	Cc-BIS-SJ	30'	90L	22.449	0	69	99	8.5	34
4	Cc-BIS-SJ	30'	90L	7.27273	75	55	32	347	58.5
5	Cc-BIS-SJ	30'	90L	20	40	56	89	99	58.5
6	Cc-BIS-SJ	30'	90L	29.1667	42.8571	61	150.5	119	58.5
7	Cc-BIS-SJ	30'	90L	21.5686	18.1818	54	95.5	35.5	1.5
8	Cc-BIS-SJ	30'	90L	5.71429	50	60	22.5	201.5	9.5
9	Cc-BIS-SJ	30'	90L	16.6667	42.8571	60	73	119	9.5
10	Cc-BIS-SJ	30'	90L	12.2449	16.6667	55	49.5	30.5	58.5
1	Cc-BIS-SJ	60'	30L	26.4706	72.2222	80	132	341.5	231.5
2	Cc-BIS-SJ	60'	30L	29.2308	26.3158	80	152	54	231.5
3	Cc-BIS-SJ	60'	30L	24.3902	50	73	116	201.5	256.5
4	Cc-BIS-SJ	60'	30L	14.7059	50	82	58	201.5	254
5	Cc-BIS-SJ	60'	30L	16.6667	50	81	73	201.5	251.5
6	Cc-BIS-SJ	60'	30L	34.6667	42.3077	85	190	113	276.5
7	Cc-BIS-SJ	60'	30L	36.9231	58.3333	85	202	289.5	276.5
8	Cc-BIS-SJ	60'	30L	19.6721	41.6667	75	86	111.5	276.5
9	Cc-BIS-SJ	60'	30L	29.6875	10.5263	80	154	20	231.5
10	Cc-BIS-SJ	60'	30L	24.6914	50	70	118	201.5	334.5
1	Cc-BIS-SJ	60'	60L	28.1818	48.3871	80	142	167	156.5
2	Cc-BIS-SJ	60'	60L	32.6797	74	80	175	345	156.5
3	Cc-BIS-SJ	60'	60L	23.8095	50	80	107.5	201.5	156.5
4	Cc-BIS-SJ	60'	60L	42.6752	58.209	80	252	288	156.5
5	Cc-BIS-SJ	60'	60L	37.4101	48.0769	82	205	162	186
6	Cc-BIS-SJ	60'	60L	24.3421	59.4595	85	114	298.5	199
7	Cc-BIS-SJ	60'	60L	24	73.3333	83	110.5	344	191
8	Cc-BIS-SJ	60'	60L	39.2308	62.7451	80	223	318	156.5
9	Cc-BIS-SJ	60'	60L	26.0563	59.4595	77	129	298.5	126
10	Cc-BIS-SJ	60'	60L	34.0909	50	80	183	201.5	156.5
1	Cc-BIS-SJ	60'	90L	28.6408	49.1525	70	146	178	58.5
2	Cc-BIS-SJ	60'	90L	27.0718	44.898	75	138	138	108.5
3	Cc-BIS-SJ	60'	90L	27.957	51.9231	70	140	236	58.5
4	Cc-BIS-SJ	60'	90L	34.5	47.8261	72	189	160	87
5	Cc-BIS-SJ	60'	90L	26.8908	39.0625	65	136	93	21.5
6	Cc-BIS-SJ	60'	90L	20.6897	54.7619	75	92	265	108.5
7	Cc-BIS-SJ	60'	90L	26.7327	72.2222	68	135	341.5	28
8	Cc-BIS-SJ	60'	90L	30.5556	46.9697	69	158	157	34
9	Cc-BIS-SJ	60'	90L	32.1429	44.4444	68	168	132	28
10	Cc-BIS-SJ	60'	90L	21.1982	58.6957	70	93	292	58.5
1	Cc-BIS-SJ	90'	30L	9.52381	50	100	39.5	201.5	334.5
2	Cc-BIS-SJ	90'	30L	15.5556	42.8571	95	65.5	119	276.5
3	Cc-BIS-SJ	90'	30L	24	8.33333	100	110.5	18	276.5
4	Cc-BIS-SJ	90'	30L	21.5385	92.8571	100	94	358	334.5
5	Cc-BIS-SJ	90'	30L	20	40	100	89	99	334.5
6	Cc-BIS-SJ	90'	30L	29.1667	42.8571	98	150.5	119	305.5
7	Cc-BIS-SJ	90'	30L	21.5686	18.1818	100	95.5	35.5	334.5
8	Cc-BIS-SJ	90'	30L	5.71429	50	100	22.5	201.5	334.5
9	Cc-BIS-SJ	90'	30L	16.6667	42.8571	100	73	119	334.5
10	Cc-BIS-SJ	90'	30L	12.2449	16.6667	99	49.5	30.5	308
1	Cc-BIS-SJ	90'	60L	39.3939	78.8462	80	225	353	156.5
2	Cc-BIS-SJ	90'	60L	44.7368	58.8235	80	267	295	156.5
3	Cc-BIS-SJ	90'	60L	48.9796	52.0833	90	298	237	58.5
4	Cc-BIS-SJ	90'	60L	46.4286	57.6923	80	278	285	156.5
5	Cc-BIS-SJ	90'	60L	35.0427	34.1463	90	193	71.5	58.5
6	Cc-BIS-SJ	90'	60L	60	51.6667	80	348	234	156.5
7	Cc-BIS-SJ	90'	60L	48.7179	63.1579	90	297	321.5	231.5
8	Cc-BIS-SJ	90'	60L	55.5556	90	90	326.5	357	156.5
9	Cc-BIS-SJ	90'	60L	48.3051	63.1579	75	292	321.5	58.5
10	Cc-BIS-SJ	90'	60L	40.6504	66	95	236	330	276.5
1	Cc-BIS-SJ	90'	90L	43.75	54.2857	75	257	258	108.5
2	Cc-BIS-SJ	90'	90L	46.7456	65.8228	75	284	329	108.5
3	Cc-BIS-SJ	90'	90L	38.3562	60.7143	70	212	308	58.5
4	Cc-BIS-SJ	90'	90L	43.75	71.4286	73	257	339.5	90
5	Cc-BIS-SJ	90'	90L	49.4382	59.0909	70	299	296	58.5
6	Cc-BIS-SJ	90'	90L	45.5782	55.2239	75	273	268	108.5
7	Cc-BIS-SJ	90'	90L	41.1765	69.3878	80	239	338	156.5
8	Cc-BIS-SJ	90'	90L	38.4615	48	80	214.5	161	156.5
9	Cc-BIS-SJ	90'	90L	46.1078	57.1429	71	276	282.5	82.5
10	Cc-BIS-SJ	90'	90L	53.125	55.8824	75	315.5	272	108.5
1	Cc-BIS-SJ	120'	30L	30.137	27.2727	100	156	56	334.5
2	Cc-BIS-SJ	120'	30L	4.7619	0	100	18	8.5	334.5
3	Cc-BIS-SJ	120'	30L	3.7037	0	100	15.5	8.5	334.5
4	Cc-BIS-SJ	120'	30L	19.6429	18.1818	100	85	35.5	334.5
5	Cc-BIS-SJ	120'	30L	15.0943	12.5	100	63	23	334.5
6	Cc-BIS-SJ	120'	30L	24.3902	60	98	116	303.5	305.5
7	Cc-BIS-SJ	120'	30L	28.5714	33.3333	100	145	68.5	334.5
8	Cc-BIS-SJ	120'	30L	18.5185	80	100	79	354	334.5
9	Cc-BIS-SJ	120'	30L	11.7647	50	100	46	201.5	334.5
10	Cc-BIS-SJ	120'	30L	30.9859	18.1818	100	159	35.5	334.5
1	Cc-BIS-SJ	120'	60L	25.4545	53.5714	90	123	253	231.5
2	Cc-BIS-SJ	120'	60L	29.0909	37.5	80	149	85	156.5
3	Cc-BIS-SJ	120'	60L	33.1288	25.9259	90	179	53	231.5
4	Cc-BIS-SJ	120'	60L	38.5714	66.6667	96	216	333	298
5	Cc-BIS-SJ	120'	60L	31.6832	78.125	95	164	352	276.5
6	Cc-BIS-SJ	120'	60L	24.7706	40.7407	90	119	107	231.5
7	Cc-BIS-SJ	120'	60L	37.7193	37.2093	90	208	84	231.5
8	Cc-BIS-SJ	120'	60L	24.1071	85.1852	100	112	356	334.5
9	Cc-BIS-SJ	120'	60L	31.9672	84.6154	98	167	355	305.5
10	Cc-BIS-SJ	120'	60L	49.4737	44.6809	100	300	136	334.5
1	Cc-BIS-SJ	120'	90L	24.1379	48.9796	80	113	175	156.5
2	Cc-BIS-SJ	120'	90L	41.2121	38.2353	90	240	88	298
3	Cc-BIS-SJ	120'	90L	48.538	44.5783	70	294	134	58.5
4	Cc-BIS-SJ	120'	90L	42.1965	35.6164	95	246	77	276.5
5	Cc-BIS-SJ	120'	90L	43.7908	31.3433	80	259	64	156.5
6	Cc-BIS-SJ	120'	90L	50.625	39.5062	95	304	95	276.5
7	Cc-BIS-SJ	120'	90L	45.7516	31.4286	90	274	65	231.5
8	Cc-BIS-SJ	120'	90L	44.7674	35.0649	90	268	75	231.5
9	Cc-BIS-SJ	120'	90L	46.1988	31.6456	90	277	66	231.5
10	Cc-BIS-SJ	120'	90L	47.9638	43.3962	97	291	125	302
1	Cc-BIS-Tuc	30'	30L	12.14	36.3	63	48	81	191
2	Cc-BIS-Tuc	30'	30L	11.92	45.6	70	47	142.5	199
3	Cc-BIS-Tuc	30'	30L	11.15	36.7	60	44	82	231.5
4	Cc-BIS-Tuc	30'	30L	15.63	25.8	56	68	52	231.5
5	Cc-BIS-Tuc	30'	30L	23.16	35.8	70	102	78	231.5
6	Cc-BIS-Tuc	30'	30L	19.08	45.3	62	82	140	186
7	Cc-BIS-Tuc	30'	30L	21.63	23.9	65	97	50	199
8	Cc-BIS-Tuc	30'	30L	17.55	50.5	69	77	225.5	199
9	Cc-BIS-Tuc	30'	30L	12.69	45.9	68	53	145.5	211
10	Cc-BIS-Tuc	30'	30L	16.91	50.1	62	76	223	208.5
1	Cc-BIS-Tuc	30'	60L	36.69	43.6	73	199	129	90
2	Cc-BIS-Tuc	30'	60L	27.49	52.3	65	139	239	108.5
3	Cc-BIS-Tuc	30'	60L	25.79	45.9	66	125	145.5	123
4	Cc-BIS-Tuc	30'	60L	28.75	66.39	75	147	331	108.5
5	Cc-BIS-Tuc	30'	60L	23.93	43.6	64	109	129	93.5
6	Cc-BIS-Tuc	30'	60L	12.25	48.6	70	51	170.5	58.5
7	Cc-BIS-Tuc	30'	60L	34.88	44.5	67	191	133	126
8	Cc-BIS-Tuc	30'	60L	45.97	53.7	71	275	256	82.5
9	Cc-BIS-Tuc	30'	60L	36.88	48.38	68	201	166	28
10	Cc-BIS-Tuc	30'	60L	21.74	50.9	69	98	228	34
1	Cc-BIS-Tuc	30'	90L	20.38	60.3	60	91	306	9.5
2	Cc-BIS-Tuc	30'	90L	25.8	48.5	61	126	168.5	15.5
3	Cc-BIS-Tuc	30'	90L	32.87	30.6	69	178	62	34
4	Cc-BIS-Tuc	30'	90L	18.74	50.4	60	80	224	58.5
5	Cc-BIS-Tuc	30'	90L	29.93	46.5	55	155	149.5	21.5
6	Cc-BIS-Tuc	30'	90L	32.46	45.87	60	173	144	9.5
7	Cc-BIS-Tuc	30'	90L	41.27	38.29	54	242	89	1.5
8	Cc-BIS-Tuc	30'	90L	15.93	50.7	59	69	227	4
9	Cc-BIS-Tuc	30'	90L	26.73	48.9	60	134	173.5	9.5
10	Cc-BIS-Tuc	30'	90L	23.48	47.6	61	103	159	58.5
1	Cc-BIS-Tuc	60'	30L	46.78	52.4	70	286	241.5	231.5
2	Cc-BIS-Tuc	60'	30L	39.76	46.5	75	229	149.5	276.5
3	Cc-BIS-Tuc	60'	30L	35.93	48.6	83	197	170.5	256.5
4	Cc-BIS-Tuc	60'	30L	25.85	52.3	82	127	239	254
5	Cc-BIS-Tuc	60'	30L	36.87	40.9	80	200	108	334.5
6	Cc-BIS-Tuc	60'	30L	54.65	52.7	69	324	245	276.5
7	Cc-BIS-Tuc	60'	30L	38.23	61.45	70	210	314	276.5
8	Cc-BIS-Tuc	60'	30L	39.72	46.3	75	228	147	276.5
9	Cc-BIS-Tuc	60'	30L	31.75	41.5	80	166	110	334.5
10	Cc-BIS-Tuc	60'	30L	34.91	61.4	70	192	313	334.5
1	Cc-BIS-Tuc	60'	60L	38.34	52.9	80	211	248.5	231.5
2	Cc-BIS-Tuc	60'	60L	42.65	54.4	80	251	262	156.5
3	Cc-BIS-Tuc	60'	60L	33.95	52.3	80	182	239	156.5
4	Cc-BIS-Tuc	60'	60L	52.75	67.6	80	312	335	156.5
5	Cc-BIS-Tuc	60'	60L	47.46	58.73	72	290	294	186
6	Cc-BIS-Tuc	60'	60L	44.42	63.5	85	263	324.5	199
7	Cc-BIS-Tuc	60'	60L	35.67	53.4	83	195	252	191
8	Cc-BIS-Tuc	60'	60L	48.69	52.9	70	295	248.5	156.5
9	Cc-BIS-Tuc	60'	60L	46.63	51.4	80	281	230.5	156.5
10	Cc-BIS-Tuc	60'	60L	44.36	49.3	70	262	180	231.5
1	Cc-BIS-Tuc	60'	90L	39.34	59.1	70	224	297	58.5
2	Cc-BIS-Tuc	60'	90L	36.96	40.5	71	204	105	82.5
3	Cc-BIS-Tuc	60'	90L	47.18	46.7	70	288	153	58.5
4	Cc-BIS-Tuc	60'	90L	44.65	56.2	60	265	275	9.5
5	Cc-BIS-Tuc	60'	90L	35.75	42.5	65	196	114	21.5
6	Cc-BIS-Tuc	60'	90L	32.38	52.8	75	171	246.5	108.5
7	Cc-BIS-Tuc	60'	90L	23.77	52.4	65	106	241.5	21.5
8	Cc-BIS-Tuc	60'	90L	40.75	55.9	69	237	273	34
9	Cc-BIS-Tuc	60'	90L	42.28	54.6	65	247	263.5	21.5
10	Cc-BIS-Tuc	60'	90L	32.77	48.3	66	176	164.5	58.5
1	Cc-BIS-Tuc	90'	30L	28.38	61.2	100	144	310	334.5
2	Cc-BIS-Tuc	90'	30L	25.76	43.2	95	124	124	276.5
3	Cc-BIS-Tuc	90'	30L	31.56	23.5	100	162	49	334.5
4	Cc-BIS-Tuc	90'	30L	32.84	62.9	100	177	320	334.5
5	Cc-BIS-Tuc	90'	30L	36.53	54.3	100	198	259.5	334.5
6	Cc-BIS-Tuc	90'	30L	38.64	46.4	98	217	148	305.5
7	Cc-BIS-Tuc	90'	30L	32.64	38.4	100	174	90	334.5
8	Cc-BIS-Tuc	90'	30L	26.48	48.7	100	133	172	334.5
9	Cc-BIS-Tuc	90'	30L	46.57	40.4	100	279	104	334.5
10	Cc-BIS-Tuc	90'	30L	32.44	46.7	90	172	153	334.5
1	Cc-BIS-Tuc	90'	60L	49.58	58.4	80	301	291	156.5
2	Cc-BIS-Tuc	90'	60L	51.32	61.23	75	306	312	108.5
3	Cc-BIS-Tuc	90'	60L	46.75	52.8	70	285	246.5	58.5
4	Cc-BIS-Tuc	90'	60L	53.25	54.3	80	319	259.5	156.5
5	Cc-BIS-Tuc	90'	60L	42.47	44.6	80	249	135	58.5
6	Cc-BIS-Tuc	90'	60L	58.45	60.4	80	340	307	156.5
7	Cc-BIS-Tuc	90'	60L	53.19	53.58	80	317	254	156.5
8	Cc-BIS-Tuc	90'	60L	60.76	55.6	80	350	270.5	156.5
9	Cc-BIS-Tuc	90'	60L	58.5	63.5	78	341	324.5	58.5
10	Cc-BIS-Tuc	90'	60L	55.65	56.4	75	328	277	108.5
1	Cc-BIS-Tuc	90'	90L	53.55	51.8	75	320	235	108.5
2	Cc-BIS-Tuc	90'	90L	56.4	55.2	70	333	267	58.5
3	Cc-BIS-Tuc	90'	90L	58.61	50.5	70	342	225.5	58.5
4	Cc-BIS-Tuc	90'	90L	63.54	51.28	73	357	229	90
5	Cc-BIS-Tuc	90'	90L	59.41	49.09	70	346	176	58.5
6	Cc-BIS-Tuc	90'	90L	55.82	45.22	75	329	139	108.5
7	Cc-BIS-Tuc	90'	90L	51.64	59.7	60	309	301	9.5
8	Cc-BIS-Tuc	90'	90L	58.15	49.1	60	339	177	9.5
9	Cc-BIS-Tuc	90'	90L	56.78	51.4	71	334	230.5	82.5
10	Cc-BIS-Tuc	90'	90L	59.25	54.6	75	345	263.5	108.5
1	Cc-BIS-Tuc	120'	30L	31.39	57.7	100	161	286	334.5
2	Cc-BIS-Tuc	120'	30L	34.19	30.8	100	185	63	334.5
3	Cc-BIS-Tuc	120'	30L	23.73	43.7	100	105	131	334.5
4	Cc-BIS-Tuc	120'	30L	29.28	38.1	100	153	87	334.5
5	Cc-BIS-Tuc	120'	30L	25.95	45.5	100	128	141	334.5
6	Cc-BIS-Tuc	120'	30L	34.24	40.2	95	186	103	276.5
7	Cc-BIS-Tuc	120'	30L	38.71	53.6	96	220	255	298
8	Cc-BIS-Tuc	120'	30L	28.15	40.6	100	141	106	334.5
9	Cc-BIS-Tuc	120'	30L	31.06	46.7	100	160	153	334.5
10	Cc-BIS-Tuc	120'	30L	30.29	42.6	100	157	115	334.5
1	Cc-BIS-Tuc	120'	60L	38.45	54.1	90	213	257	231.5
2	Cc-BIS-Tuc	120'	60L	39.16	43.6	90	221	129	231.5
3	Cc-BIS-Tuc	120'	60L	43.12	35.9	90	254	79	231.5
4	Cc-BIS-Tuc	120'	60L	48.7	56.8	96	296	280	298
5	Cc-BIS-Tuc	120'	60L	41.6	55.5	95	244	269	276.5
6	Cc-BIS-Tuc	120'	60L	44.7	43.4	90	266	126.5	231.5
7	Cc-BIS-Tuc	120'	60L	47.4	48.3	95	289	164.5	276.5
8	Cc-BIS-Tuc	120'	60L	34.1	55.1	100	184	266	334.5
9	Cc-BIS-Tuc	120'	60L	31.7	34.6	100	165	73	334.5
10	Cc-BIS-Tuc	120'	60L	39.4	44.8	100	226	137	334.5
1	Cc-BIS-Tuc	120'	90L	54.7	58.7	80	325	293	156.5
2	Cc-BIS-Tuc	120'	90L	51.4	48.5	96	307	168.5	298
3	Cc-BIS-Tuc	120'	90L	48.5	46.8	86	293	155	205.5
4	Cc-BIS-Tuc	120'	90L	52.9	55.6	95	313	270.5	276.5
5	Cc-BIS-Tuc	120'	90L	53.9	41.3	90	321	109	231.5
6	Cc-BIS-Tuc	120'	90L	54.6	59.5	95	323	300	276.5
7	Cc-BIS-Tuc	120'	90L	55.9	43.4	90	330	126.5	231.5
8	Cc-BIS-Tuc	120'	90L	46.6	45.6	90	280	142.5	231.5
9	Cc-BIS-Tuc	120'	90L	59.9	51.6	95	347	233	276.5
10	Cc-BIS-Tuc	120'	90L	57.9	48.9	95	337	173.5	276.5
[truncated: 6 more columns]
